# Supplementary material for: Potential Use of Waste Activated Sludge Hydrothermally Treated as a Renewable Fuel or Activated Carbon Precursor
Source: PubMed Central journal article supplement (PMC7435997; doi:10.3390/molecules25153534), 2020-08-02
Supplement: molecules-25-03534-s001.pdf [file molecules-25-03534-s001.pdf]

*Supplementary Material*

# **Potential use of waste activated sludge hydrothermally treated as a renewable fuel or activated carbon precursor**

**J. A. Villamil <sup>1,\*</sup>, E. Diaz <sup>2</sup>, M.A. De la Rubia <sup>2</sup> and A. F. Mohedano <sup>2</sup>**

<sup>1</sup> Departamento de Tecnología Química y Ambiental. Universidad Rey Juan Carlos, 28933 Móstoles (Madrid), Spain

<sup>2</sup> Departamento de Ingeniería Química, Facultad de Ciencias, Universidad Autónoma de Madrid, Campus de Cantoblanco, 28049 Madrid, Spain

\* Correspondence: john.villamil@urjc.es

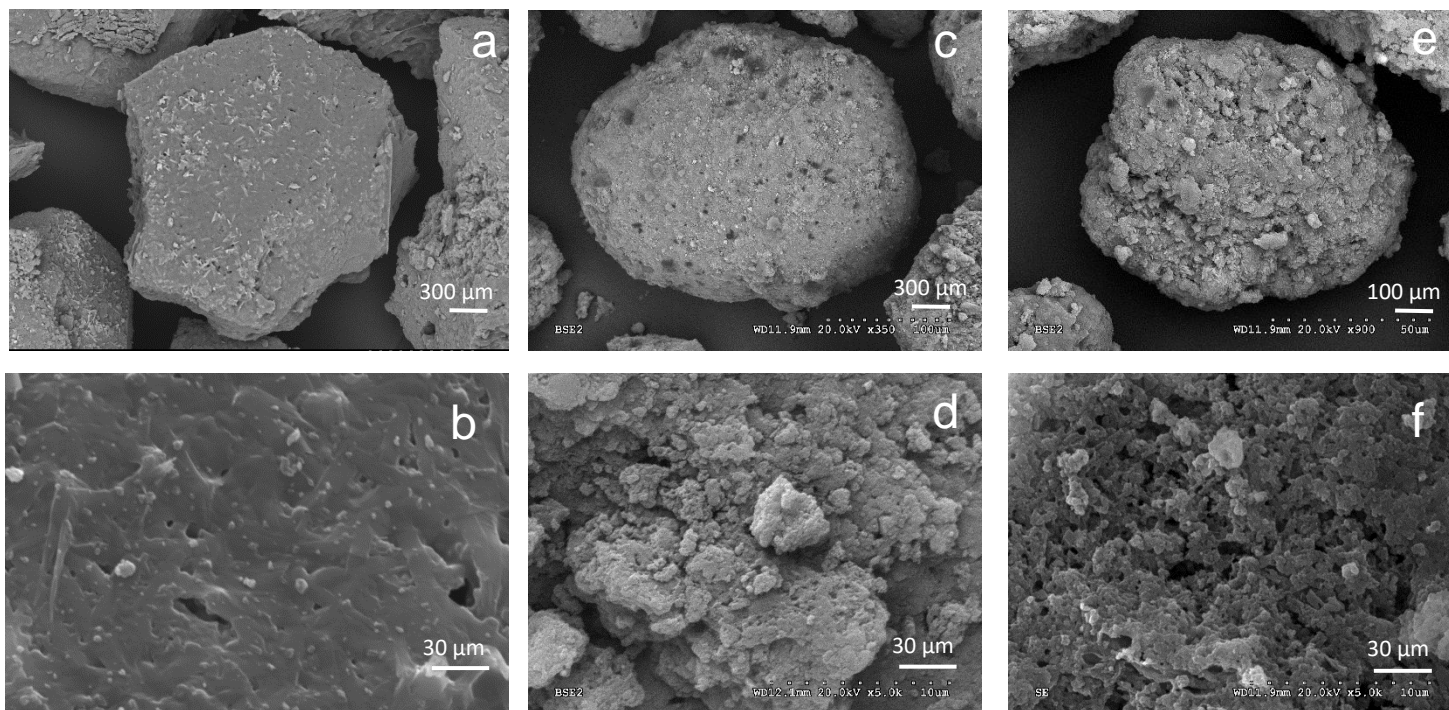

**Figure S1.** SEM images of DWAS (a, b), hydrochar (208 °C for 1 h) (c, d), and air-activated hydrochar (325 °C for 2 h) (e, f).

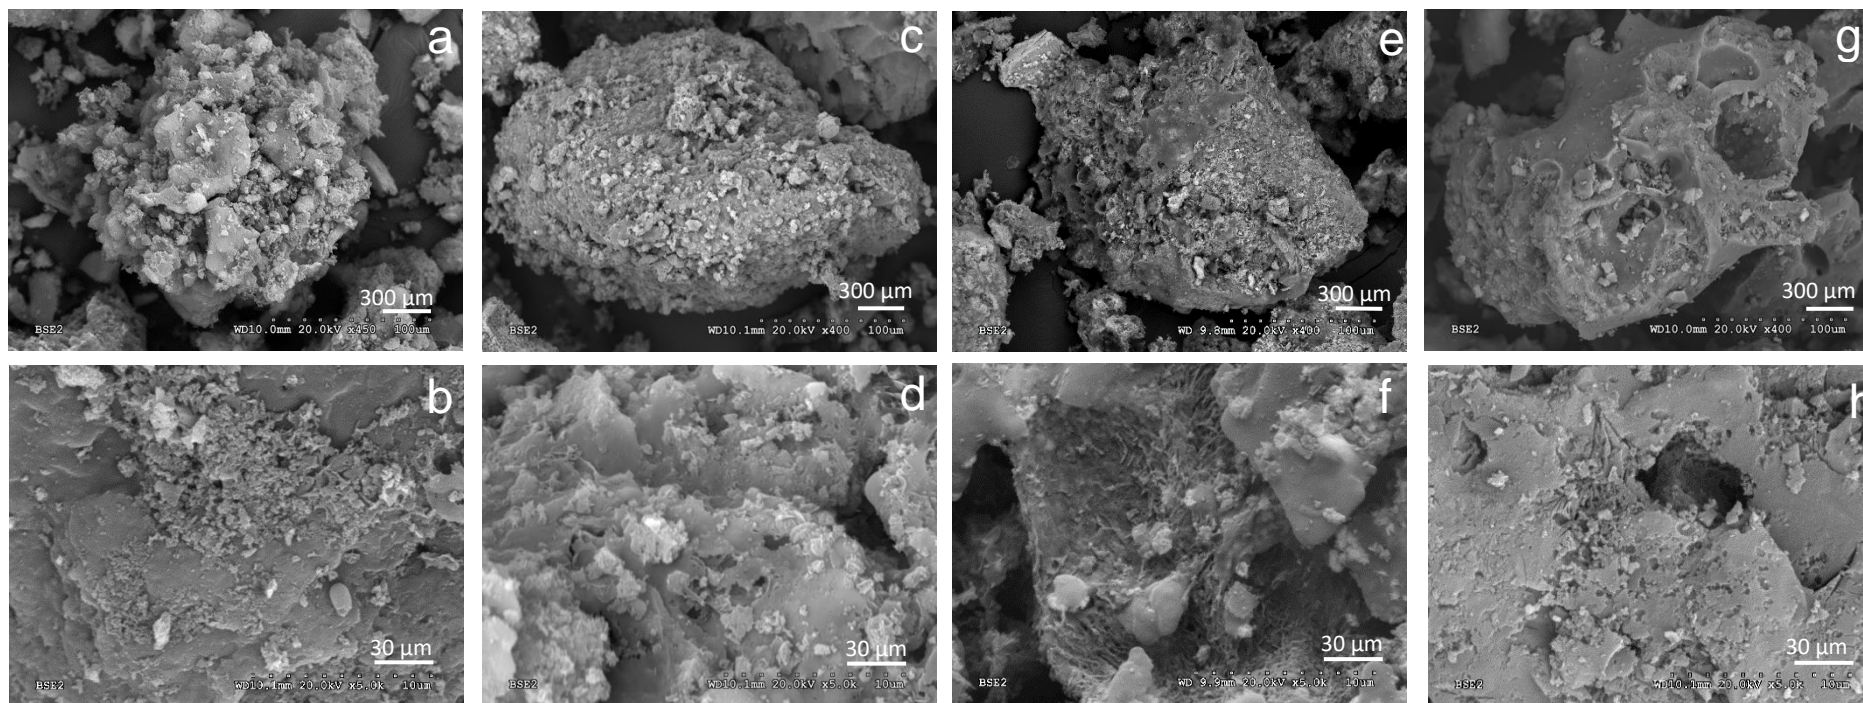

0 **Figure S2.** SEM images of K<sub>2</sub>CO<sub>3</sub>-AC (a, b), KOH-AC (c, d), FeCl<sub>3</sub>-AC (e, f), and ZnCl<sub>2</sub>-AC (g, h) activated at 850 °C for 1 h.

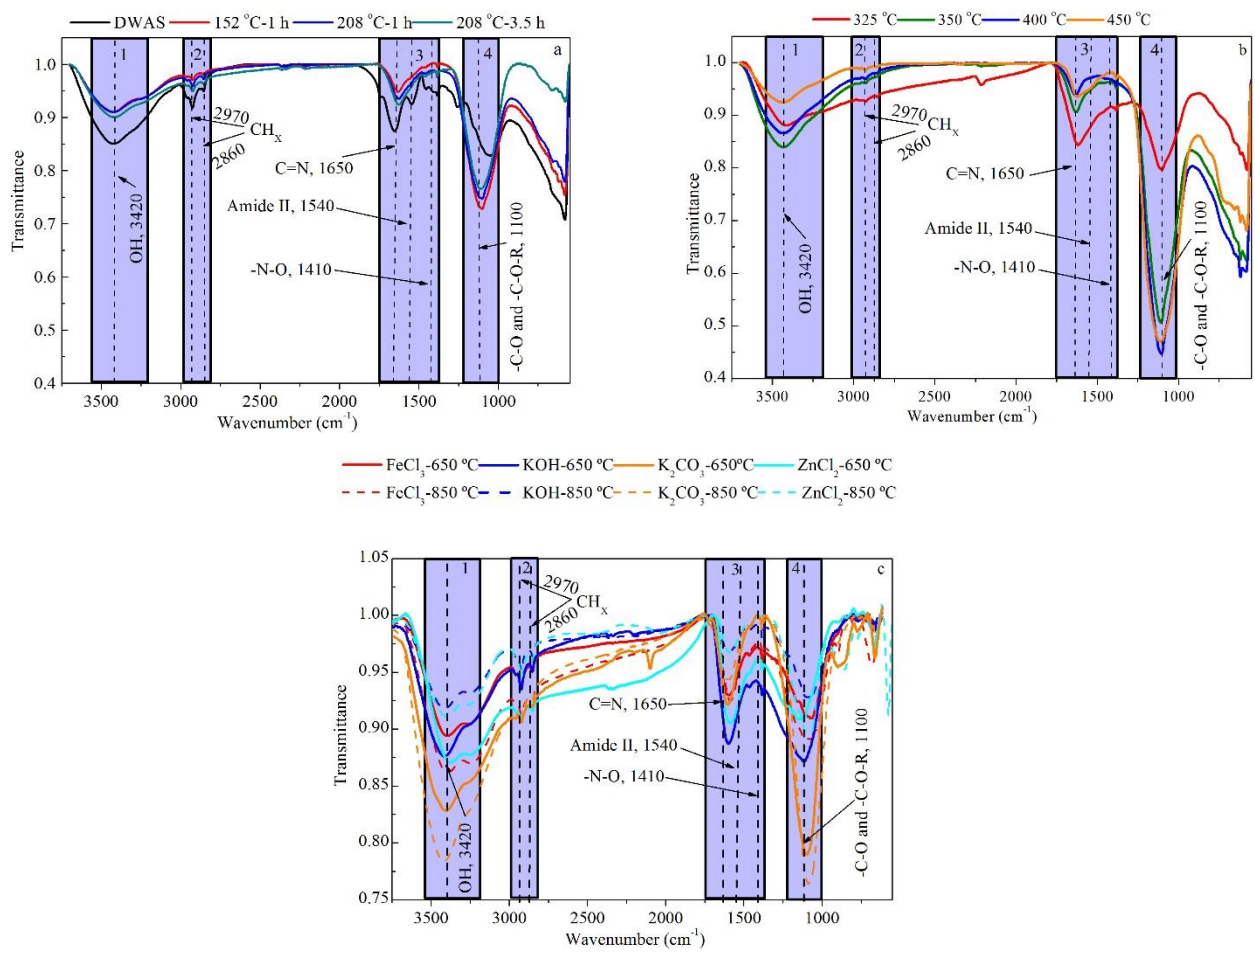

1 **Figure S3.** FTIR spectra of dewatered waste activated sludge and carbon materials obtained at  
 2 different temperatures and reaction times (a); air-activated carbons obtained at several temperatures  
 3 (b); and chemically-activated carbons obtained at 650 and 850 °C (c).

4

5 **Table S1.** Assignment of Fourier transform infrared (FTIR) spectroscopy absorption bands of DWAS  
 6 and several hydrochars physical and chemically activated.

| Region                               | $\sigma$ (cm <sup>-1</sup> ) | Assignment                     | Designation                                                                             |
|--------------------------------------|------------------------------|--------------------------------|-----------------------------------------------------------------------------------------|
| I<br>(3550–3150 cm <sup>-1</sup> )   | 3420                         | $\nu$ (OH)                     | Attributed to -OH stretching vibration in carboxyl or hydroxyl groups                   |
| II<br>(3000–2750 cm <sup>-1</sup> )  | 2970,<br>2860                | $\nu$ (C-H)                    | Attributed to the asymmetric and symmetric -C-H stretching of the methylene groups      |
| III<br>(1750–1300 cm <sup>-1</sup> ) | 1650                         | $\nu$ (C=N)                    | Associated with C=N amides                                                              |
|                                      | 1540                         | $\nu$ (-N-H)                   | Attributed to -N-H in-plane bending of amide II and secondary amines                    |
|                                      | 1410                         | $\nu$ (N-O)                    | Associated with the N-O group                                                           |
| IV<br>(1200–950 cm <sup>-1</sup> )   | 1100                         | $\nu$ (-C-O), $\nu$<br>(C-O-R) | Associated with the functional group as alcohols, phenols, carboxylic acids, and esters |

7
